# Supplementary material
Source: PubMed Central journal article supplement (PMC7356595)
Supplement: NIHMS1601861-supplement-Supplementary_Figure.pdf [file NIHMS1601861-supplement-Supplementary_Figure.pdf]

# Supplementary Fig.

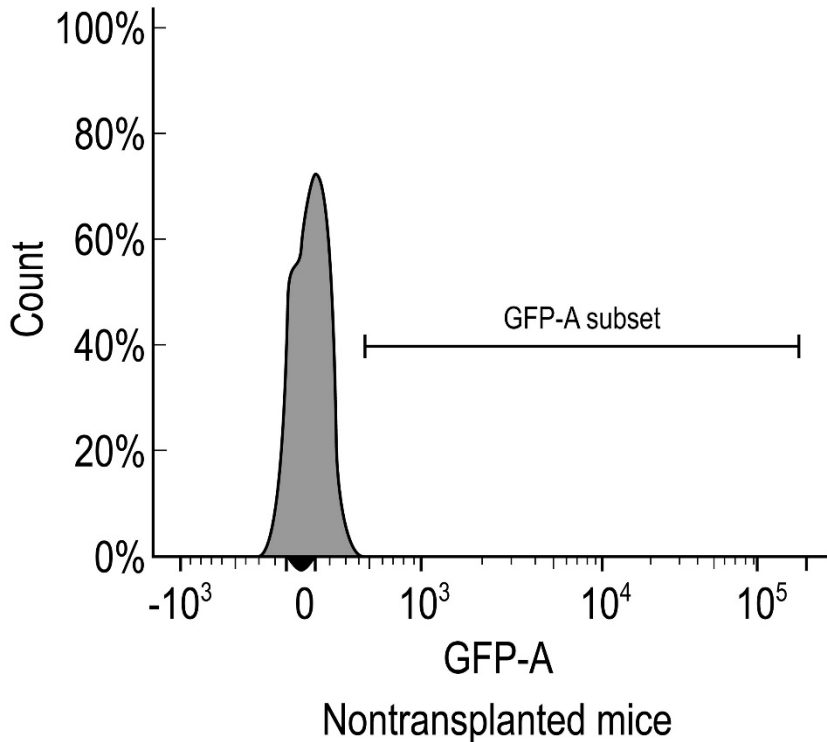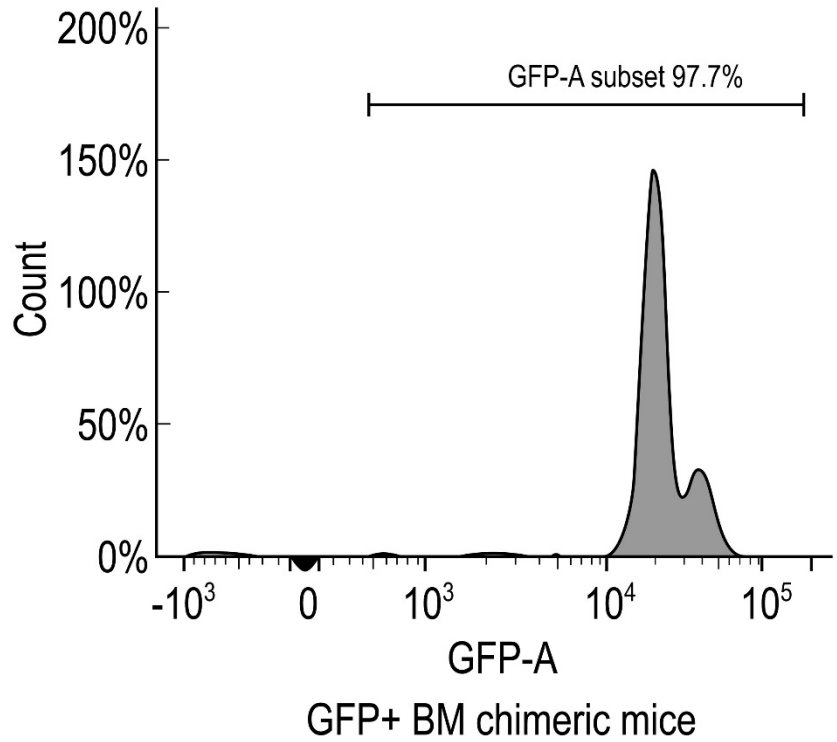

## Supplemental Figure

Recipient mice were transplanted with BM cells from GFP+ mice. FACS analysis of the peripheral blood from transplanted mice were performed four weeks after transplantation. Representative FACS analysis of a transplanted mouse showing GFP expression in 97.7% of all nucleated cells.
